# Supplementary material
Source: publisher figshare collection journal article supplement (https://acs.figshare.com/ndownloader/files/31127389)
Supplement: Supplementary file 1 [file 31127389]

# **Supporting Information for**

## **Tunable knot segregation in co-polyelectrolyte rings carrying a neutral segment**

Andrea Tagliabue,<sup>†</sup> Cristian Micheletti,<sup>\*,‡</sup> and Massimo Mella<sup>\*,†</sup>

*Dipartimento di Scienza ed Alta Tecnologia, Università degli Studi dell'Insubria, via Valleggio 11, 22100, Como, Italy, and SISSA (Scuola Internazionale Superiore di Studi Avanzati), via Bonomea 265, 34136, Trieste, Italy*

E-mail: cristian.micheletti@sissa.it; massimo.mella@uninsubria.it

---

<sup>\*</sup>To whom correspondence should be addressed

<sup>†</sup>Dipartimento di Scienza ed Alta Tecnologia, Università degli Studi dell'Insubria, via Valleggio 11, 22100, Como, Italy

<sup>‡</sup>SISSA (Scuola Internazionale Superiore di Studi Avanzati), via Bonomea 265, 34136, Trieste, Italy

## Model and methods

The simulated system consists of a single circular co-polyelectrolyte (co-PE, or "ring") contained in a periodically repeated cubic cell of side length  $L = 76.36\sigma$  ( $\sigma = 3.55 \text{ \AA}$ ), the latter value chosen in order to have a molar concentration of monomers equal to  $C_{\text{mono}} = 10^{-2} \text{ M}$ . The circular co-PE is represented via a coarse-grained "beads-springs" primitive model, and it is composed by  $N = 120$  monomers,  $N_{\text{neu}}$  of which are neutral, whereas the remaining  $N - N_{\text{neu}}$  beads carry a quenched monovalent negative charge (*i.e.*, they act as strong electrolytes). In order to maintain the system electroneutral, in solution there are also  $N_{\text{Cl}} = N - N_{\text{neu}}$  monovalent positive counterions (Cl's).

Bonds between adjacent beads are simulated via a finitely extensible non-linear elastic (FENE) potentials,<sup>1</sup>

$$U_{\text{bond}}(r_{ij}) = -\frac{1}{2}k_{\text{bond}}r_{\text{max}}^2 \ln \left( 1 - \left( \frac{r_{ij}}{r_{\text{max}}} \right)^2 \right), \quad (1)$$

where  $r_{ij}$  is the distance between two connected monomers  $i$  and  $j$ ,  $k_{\text{bond}} = 30\epsilon/\sigma^2$  is the force constant, and  $r_{\text{max}} = 3\sigma$  is the maximum allowed elongation.

All particles interact via a Weeks-Chandler-Anderson (WCA) potential<sup>2</sup> which simulate their excluded volumes:

$$U_{\text{WCA}}(r_{ij}) = \begin{cases} 4\epsilon \left[ \left( \frac{\sigma}{r_{ij}} \right)^{12} - \left( \frac{\sigma}{r_{ij}} \right)^6 + \frac{1}{4} \right] & \text{if } r_{ij} < r_{\text{cut}} \\ 0 & \text{otherwise;} \end{cases} \quad (2)$$

here,  $r_{ij}$  is the distance between two interacting particle  $i$  and  $j$ ,  $\epsilon = k_{\text{B}}T$  and  $\sigma$  are, respectively, the strength and the range of interaction, and  $r_{\text{cut}} = 2^{\frac{1}{6}}\sigma$  is the cutoff radius.

Electrostatic interactions are calculated via the P<sup>3</sup>M method, with an accuracy set to  $10^{-3}$ . The molecular structure of water is omitted, and the solvent is represented by a uniform dielectric continuum with a Bjerrum length  $l_{\text{B}} = 2\sigma$ ; setting  $\sigma = 3.55 \text{ \AA}$  thus results

in the typical Bjerrum length of water at room temperature,  $l_B = 7.10 \text{ \AA}$ .

Two different knot topologies have been investigated: the "trefoil knot" ( $3_1$ , three essential crossings) and the "pentafoil knot" ( $5_1$ , five essential crossings).

## Simulation protocol

Conformations at the equilibrium are sampled via Langevin dynamics according to

$$m_i \ddot{\mathbf{r}}_i = -\gamma \dot{\mathbf{r}}_i + \mathbf{F}_i + \mathbf{R}_i, \quad (3)$$

where  $m_i \equiv m = 1$  (in internal units) is the mass of the  $i$ -th particle,  $\dot{\mathbf{r}}$ ,  $\ddot{\mathbf{r}}$ ,  $\mathbf{F}_i$ , and  $\mathbf{R}_i$  are, respectively, its velocity, its acceleration, and the conservative and the random forces acting on it, and  $\gamma = \sigma^{-1}/(m\epsilon)^{\frac{1}{2}}$  is the friction coefficient. Random forces act on each particle independently and obey the fluctuation–dissipation theorem. Equation 3 is integrated by a velocity Verlet algorithm with a time step  $\delta t = 0.01\sigma(m/\epsilon)^{\frac{1}{2}}$ ; thus, our system time unit,  $\tau_{\text{MD}} = \sigma\sqrt{(m/\epsilon)}$ , consists in 100 integration steps.

For each case investigated, we simulated 100 independent trajectories; hence, we present the averaged results accompanied by their standard errors. During each trajectory simulation, the system has been thermalized for a time  $t_{\text{therm}} = 5 \cdot 10^5 \delta t$ . After the thermalization, the trajectory has been integrated for a time  $t_{\text{sim}} = 2 \cdot 10^6 \delta t$ , during which the system properties have been collected every  $10^3$  time steps. All simulations have been performed with the software package ESPResSo.<sup>3</sup>

## Knot analysis

Monomers in the ring are indexed as a function of their positional distance from the NS midpoint,  $\delta_{\text{NS}}$ . Thus,  $\delta_{\text{NS}} = 0$  for the two (neutral) central monomer,  $\delta_{\text{NS}} = 1$  for their first neighbors, *etc.* Analogously, we define a similar metric,  $\delta_{\text{k}}$ , in order to index the position of a bead with respect to the knot midpoint.

The knotted segments are recognized performing a bottom-up search with the software KymoKnot.<sup>4,5</sup> At each time  $t = t_0$ , we define a total ordered set  $\mathbb{K}(t_0)$  containing the position index of all the monomers taking part to the chain knotted portion; from this, one can define the "knot length"  $\ell_K$  as  $\ell_K(t_0) = \#\mathbb{K}(t_0)$ , where " $\#$ " denotes the set cardinality. Thus,  $\ell_K$  corresponds to the number of monomers lying in the knotted portion of the ring.

From the collected data, one can calculate the probability density  $\rho(\delta_{\text{NS}})$  for a monomer  $j$ , which lies at distance  $\delta_{\text{NS}}$  from the NS midpoint, to be part of the knotted segment by simply dividing the number of occurrences of a given monomer  $j$  in  $\mathbb{K}$  by the total number of conformations sampled.  $\rho(\delta_{\text{NS}})$  is normalized so to have  $\int_0^{N/2} \rho(\delta_{\text{NS}}) d\delta_{\text{NS}} = 1$ , representing *de facto* the cumulative probability for a monomer lying at a distance  $\delta_{\text{NS}}$  to be included in the knot.

We also define as "knot midpoint" the monomer  $j = j_{\text{mid}}(t_0)$  lying in the middle of the knotted arc at  $t = t_0$ . If  $\#\mathbb{K}(t_0)$  is odd,  $j_{\text{mid}}(t_0)$  results to be median element of  $\mathbb{K}$ ; conversely, if  $\#\mathbb{K}(t_0)$  is even we identify the "middle monomer" as the median element of the set  $\#\mathbb{K}^*$ , the latter a subset of  $\#\mathbb{K}(t_0)$  obtained by randomly removing from the latter the first *or* the last element with an equal probability. Analogously to  $\rho(\delta_{\text{NS}})$ , we define the density of probability  $\rho_{\text{mid}}(\delta_{\text{NS}})$  for a monomer  $j$  (which lies at distance  $\delta_{\text{NS}}$  from the NS midpoint) to be the knot midpoint. Since, also in this case,  $\int_0^{N/2} \rho_{\text{mid}}(\delta_{\text{NS}}) d\delta_{\text{NS}} = 1$ ,  $\rho_{\text{mid}}(\delta_{\text{NS}})$  represents the cumulative probability to find the knot midpoint in the interval 0–NS.



# Results

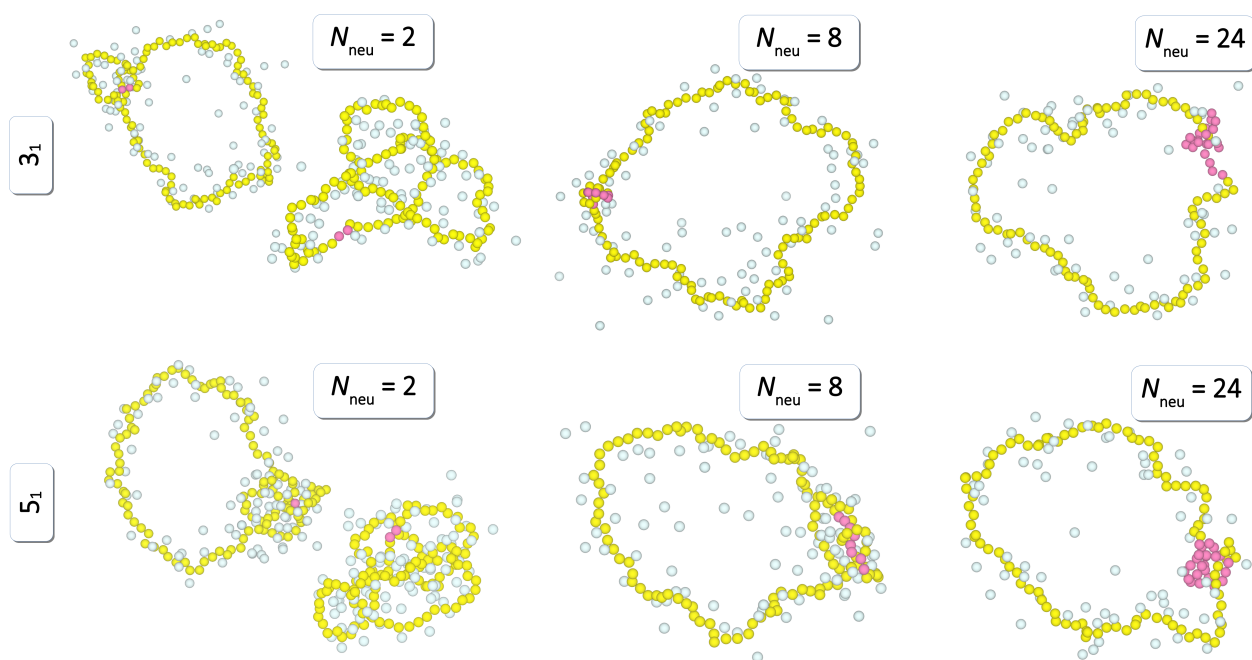

Figure S1: Selected trajectory snapshots for systems with  $N_{\text{neu}} = 2, 8,$  and  $24$ . Color scheme: neutral monomers pink, charged monomers in yellow, counterions in ice blue. The color scheme is maintained through the manuscript.

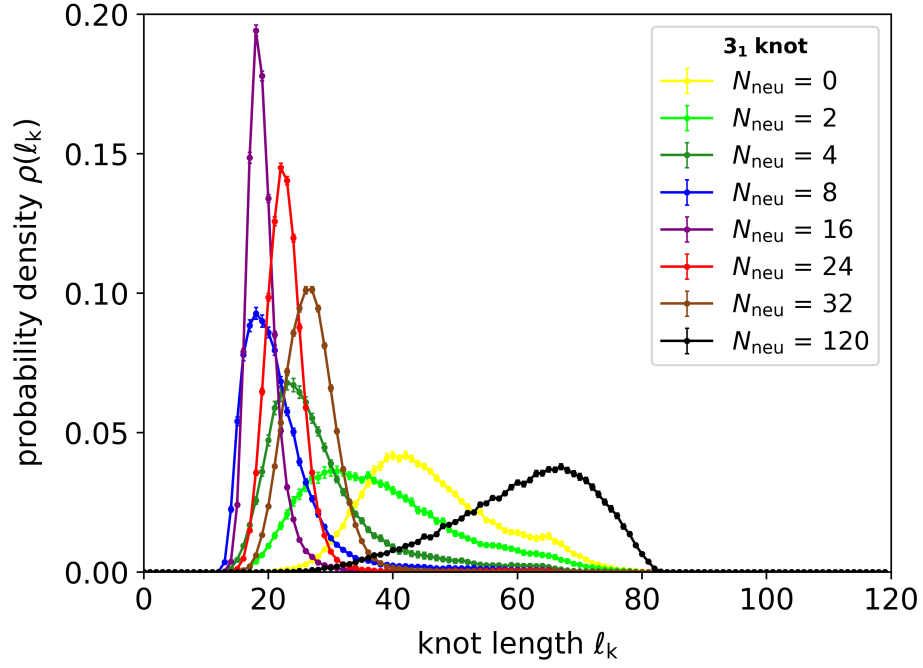

(a)  $3_1$  topology.

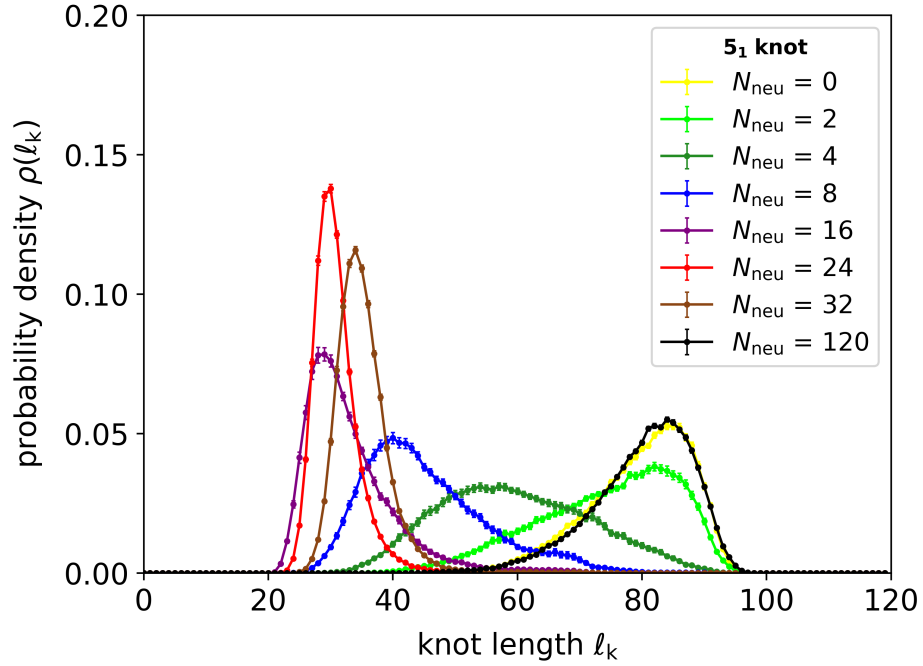

(b)  $5_1$  topology.

Figure S2: Probability densities to find ring conformations with a certain knot length  $\ell_K$ .

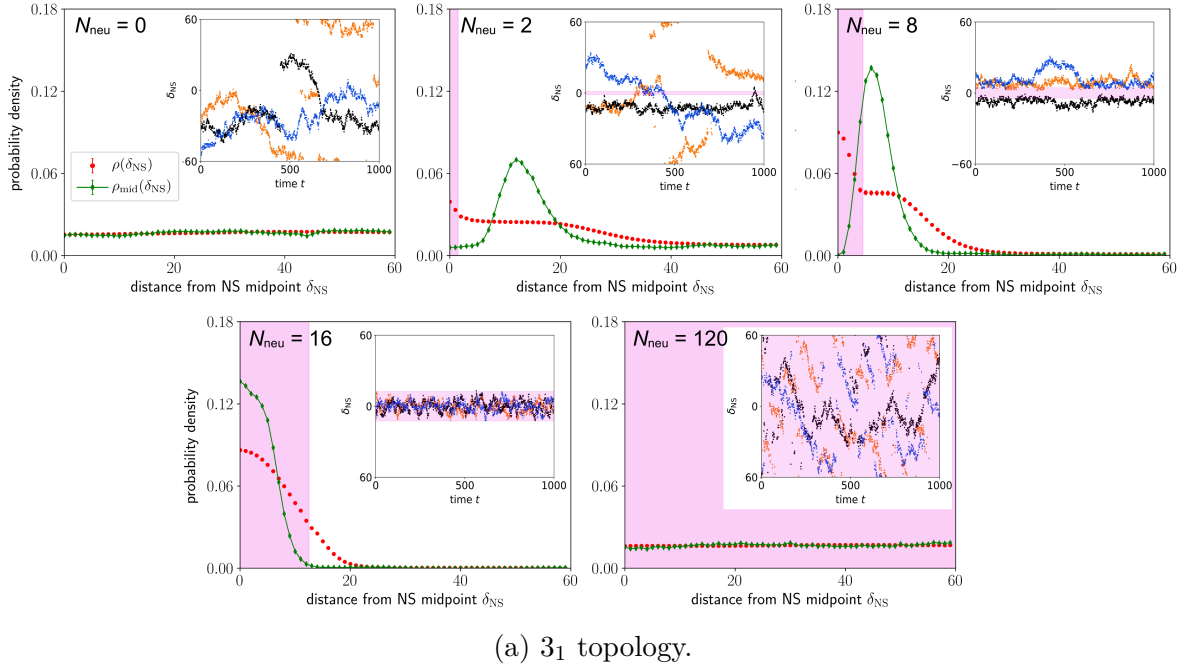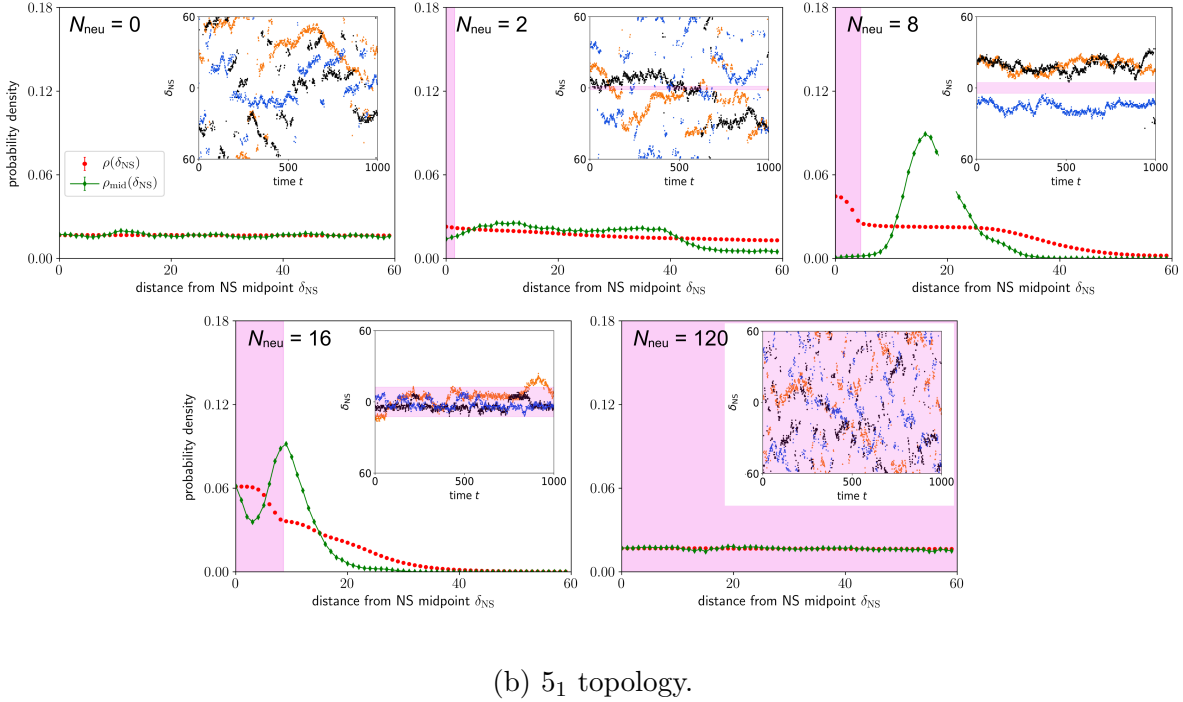

Figure S3: Probability distributions  $\rho$  and  $\rho_{\text{mid}}$  as a function the monomer distance  $\delta_{\text{NS}}$  for systems with  $N_{\text{neu}} = 0, 2, 8, 24$ , and  $120$ . Curves have been symmetrized around the latter due to the intrinsic symmetry of the co-PE's. Each inset shows 3 independent trajectories of the contour motion of the knot midpoint. Areas highlighted in pink denotes the NS's.

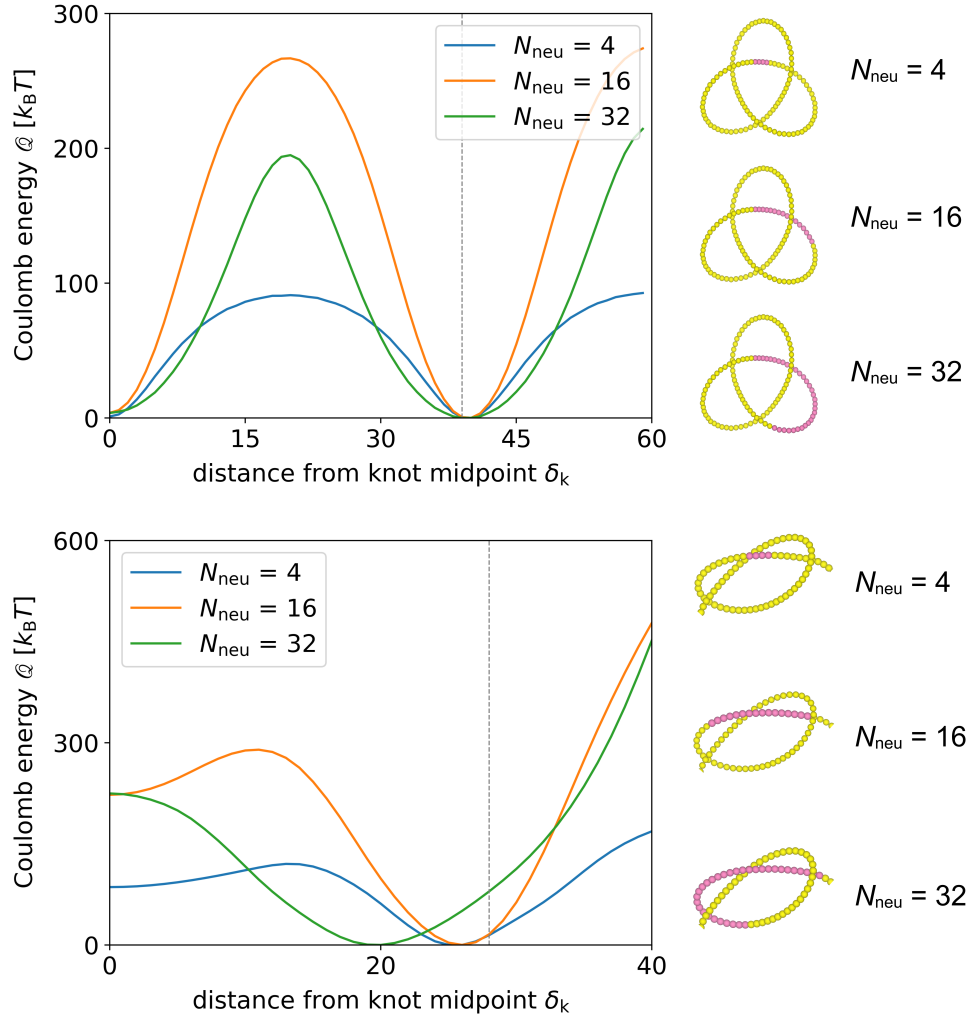

Figure S4: Coulomb energy  $\mathcal{Q}$  (in  $k_B T$  units) as a function of the distance  $\delta_k$  between knot and NS midpoints for the  $3_1$  topology and  $N_{\text{neu}}$  values. Upper panel: ideal knot,  $\ell_k = 78$ ; lower panel:  $\ell_k = 75$ .

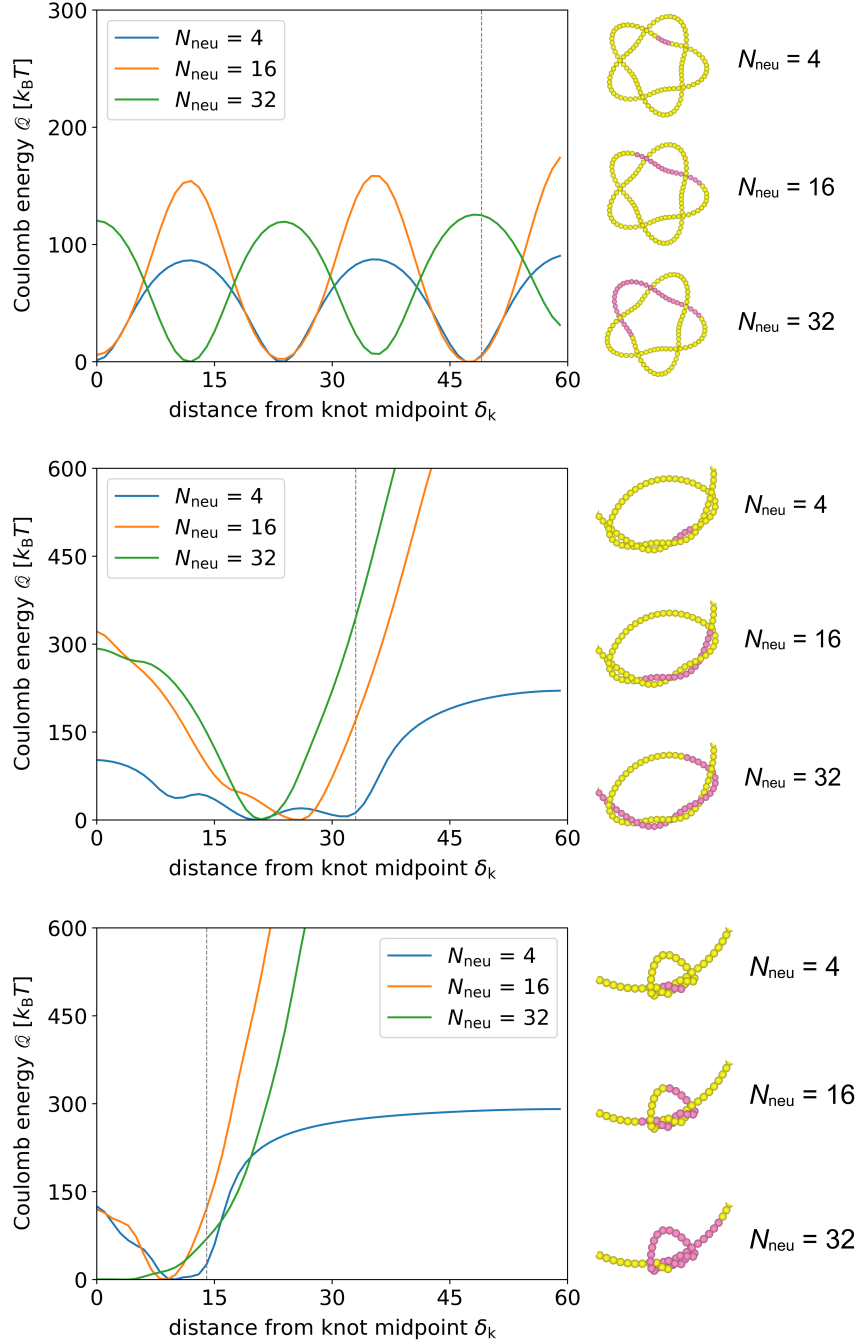

Figure S5: Coulomb energy  $\mathcal{Q}$  (in  $k_B T$  units) as a function of the distance  $\delta_k$  between knot and NS midpoints for the  $5_1$  topology and various  $N_{\text{neu}}$  values. Upper panel: ideal knot,  $\ell_k = 97$ ; central panel:  $\ell_k = 65$ , lower panel:  $\ell_k = 28$ .

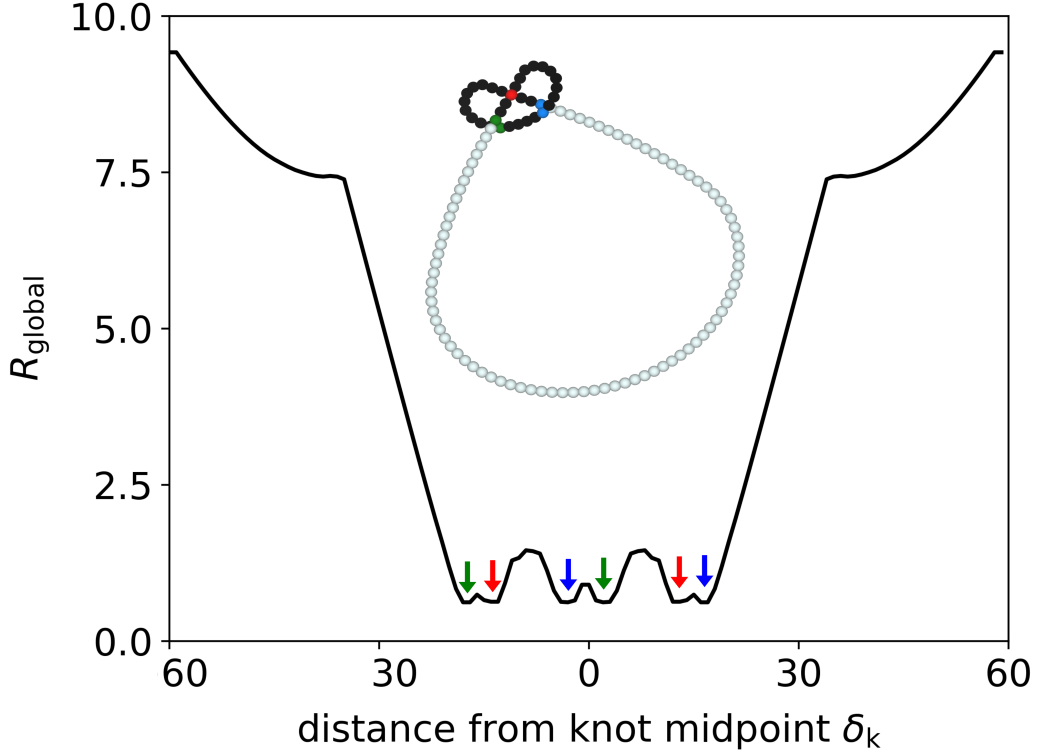

Figure S6: Global radius of curvature,  $R_{\text{global}} = R_c^g(i)$ , as a function of the monomer index,  $i$ , of the shown trefoil-knotted ring. Following ref. 6, the global radius of curvature of monomer  $i$  is defined as  $R_c^g(i) = \min_{j,k, j \neq k} r_{ijk}$ , where  $r_{ijk}$  is the radius of the circumcircle going through monomers  $i, j, k$ . The physical interpretation of  $R_c^g(i)$  is that it provides the maximum thickness to which one can inflate the curve, making it into a tube of uniform cross-section before it becomes singular at  $i$ . This can occur under two circumstances, either a tight local radius of curvature at  $i$  (in which case the minimizing  $ijk$  triplet is formed by consecutive monomers) or due to the contact of the tube at  $i$  and another region away from it<sup>6</sup>. For rings with localized knots, the minima of the  $R_c^g(i)$  profile correspond to the regions where the ring center-line is in close proximity of itself. The minima can thus be used to identify the regions defining the essential crossing, which are indicated by the colored arrows.

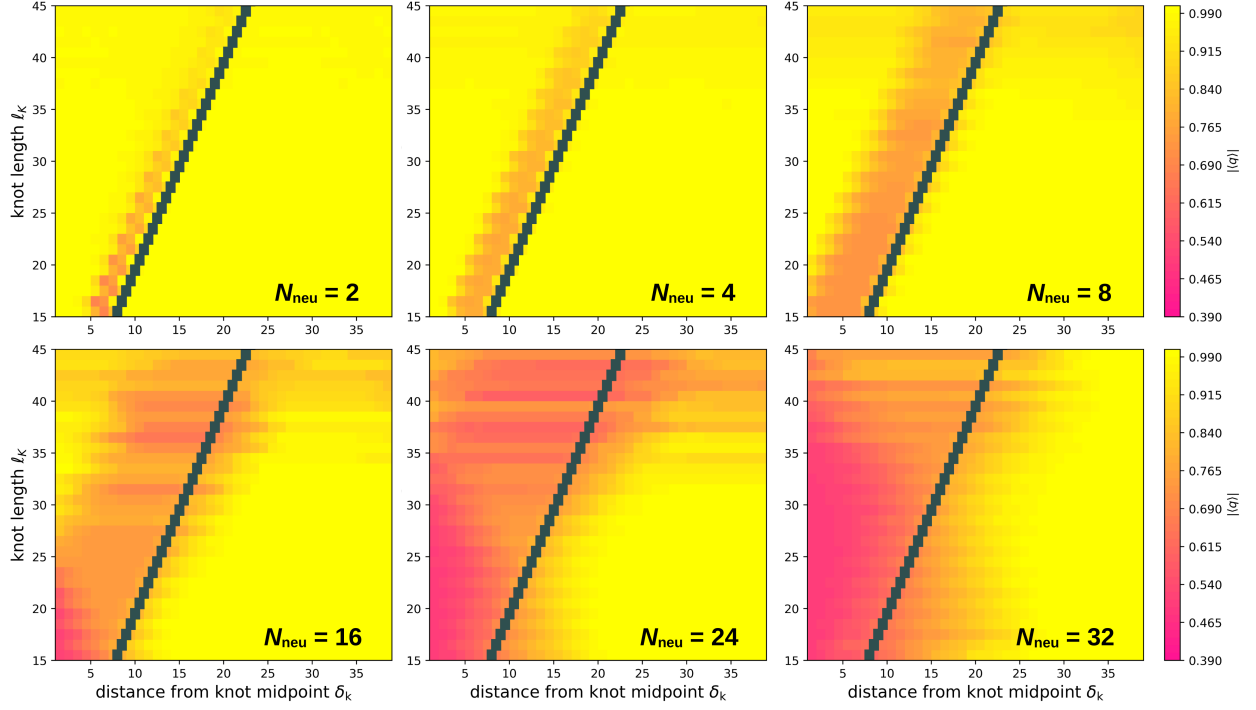

Figure S7: Unsigned average effective charge  $|\langle q \rangle|$  of monomers in  $3_1$ -knotted rings and various  $N_{\text{neu}}$ . The average is taken at various knot lengths ( $\ell_K$ ,  $y$  axis) and sequence distances ( $\delta_K$ ,  $x$  axis) from the knot midpoint. For reference, the  $\ell_K = 2\delta_K$  line is superposed to the main graphs.

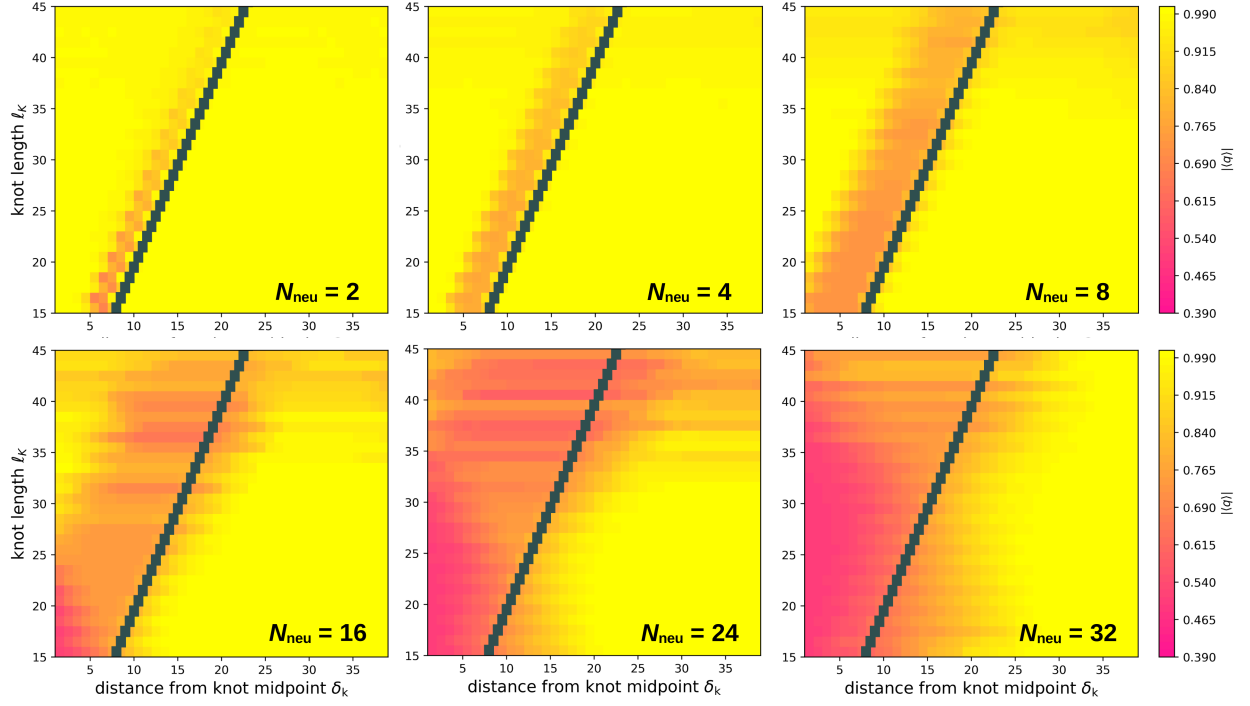

Figure S8: Unsigned average effective charge  $|\langle q \rangle|$  of monomers in  $5_1$ -knotted rings and various  $N_{\text{neu}}$ . The average is taken at various knot lengths ( $\ell_K$ ,  $y$  axis) and sequence distances ( $\delta_K$ ,  $x$  axis) from the knot midpoint. For reference, the  $\ell_K = 2\delta_K$  line is superposed to the main graphs.



## References

- (1) Kremer, K.; Grest, G. S. Dynamics of entangled linear polymer melts: A molecular-dynamics simulation. *J. Chem. Phys.* **1990**, *92*, 5057.
- (2) Weeks, J. D.; Chandler, D.; Andersen, H. C. Role of Repulsive Forces in Determining the Equilibrium Structure of Simple Liquids. *The Journal of Chemical Physics* **1971**, *54*, 5237–5247.
- (3) Weik, F.; Weeber, R.; Szuttor, K.; Breitsprecher, K.; de Graaf, J.; Kuron, M.; Landsge-  
sell, J.; Menke, H.; Sean, D.; Holm, C. ESPResSo 4.0 – An Extensible Software Package  
for Simulating Soft Matter Systems. *Eur. Phys. J-Spec. Top.* **2019**, *227*, 1789–1816.
- (4) Tubiana, L.; Polles, G.; Orlandini, E.; Micheletti, C. KymoKnot: A web server and  
software package to identify and locate knots in trajectories of linear or circular polymers.  
*European Physical Journal E* **2018**, *41*.
- (5) Tubiana, L.; Orlandini, E.; Micheletti, C. Probing the Entanglement and Locating Knots  
in Ring Polymers: A Comparative Study of Different Arc Closure Schemes. *Prog. Theor.*  
*Phys. Suppl.* **2011**, *191*, 192–204.
- (6) Gonzalez, O.; Maddocks, J. H. Global curvature, thickness, and the ideal shapes of knots.  
*Proceedings of the National Academy of Sciences* **1999**, *96*, 4769–4773.
